# Supplementary material for: Evolution des beta-lactamases tem et resistance aux inhibiteurs des beta-lactamases chez escherichia coli
Source: MDPI journal article supplement (doi:10.3390/microorganisms10071307), 1997-01-01
Supplement: s1 [file s1]

# Real-time PCR for the diagnosis of *Acanthamoeba* genotype T4

Aline Lamien-Meda <sup>1\*</sup>, Martina Köhler <sup>1</sup> and Julia Walochnik <sup>1</sup>

**Table S1.** List of sequenced samples with their genotype and strain.

| Sample Code | Genotype | Strain    |
|-------------|----------|-----------|
| 97          | T4       | 3ST       |
| 127         | T11      | ZOO9      |
| 89          | T6       | 11DS      |
| 103         | T5       | 72-2      |
| 306         | T5       | AFR6      |
| 110         | T12      | BUD9      |
| 231         | T10      | 70171     |
| 331         | T4       | STR16     |
| 111         | T4       | DU08      |
| 123         | T4       | SPA08     |
| 206         | T4       | Pes09     |
| 238         | T4       | Dih12     |
| 245         | T4       | Lar12     |
| 254         | T4       | Ume13     |
| 260         | T6       | Sck13     |
| 275         | T4       | Jäl14     |
| 289         | T4       | Str15     |
| 290         | T4       | Obr15     |
| 331         | T4       | STR16     |
| 345         | T4       | Wir17     |
| 346         | T4       | N17       |
| 356         | T4       | Tel18     |
| 357         | T4       | Rur18     |
| 365         | T4       | Stgl19    |
| 377         | T4       | Fea19     |
| 381         | T4       | XIN20     |
| 382         | T4       | MAI20     |
| 383         | T4       | Sin20     |
| 386         | T4       | Schmidt21 |
| 387         | T6       | Häg21     |
| 391         | T3       | Dab 21    |

**Table S2.** List of primers and probes.

| Assay                     | Primers and Probe                                                                                                                                       | Fragment size (bp) |
|---------------------------|---------------------------------------------------------------------------------------------------------------------------------------------------------|--------------------|
| JDP1-DP2                  | JDP1: 5'-GGCCCAGATCGTTTACCGTGAA-3'<br>JDP2: 5'-TCTCACAAGCTGCTAGGGAGTCA-3'                                                                               | 423-551            |
| Qvarnstrom                | AcantF900: 5'-CCC AGA TCG TTT ACC GTG AA-3'<br>AcantR1100: 5-AAT ATT AAT GCC CCC AAC TAT CC-3'<br>AcantP1000: 5-FAM-CTGCCACCGAATACATTAGCATGG- [BHQ1]-3' | 177                |
| Karsenti                  | AcanthF3: 5'-GGTCCGGGTAATCTTTGCAAA-3'<br>AcanthR2: 5'- GTACAAAGGGCAGGGACGTAATCAAC-3'<br>AcanthP2: 5'-FAM- TAAGCGCGAGTCATC-1 [MGB]- 3'                   | 127                |
| T4 genotype<br>This study | AcT4F1: 5'- GCTTCGCGGGCGACGTCATC-3'<br>AcT4R1: 5'- CTCAAACCTTCCGCTGGCTAGG-3'<br>AcT4P: 5'-HEX-GTTCGGCGTCCGTGCTTCTTAGAG-1 [BHQ1]                         | 112                |
| Ingenetix                 | Commercial kit                                                                                                                                          |                    |

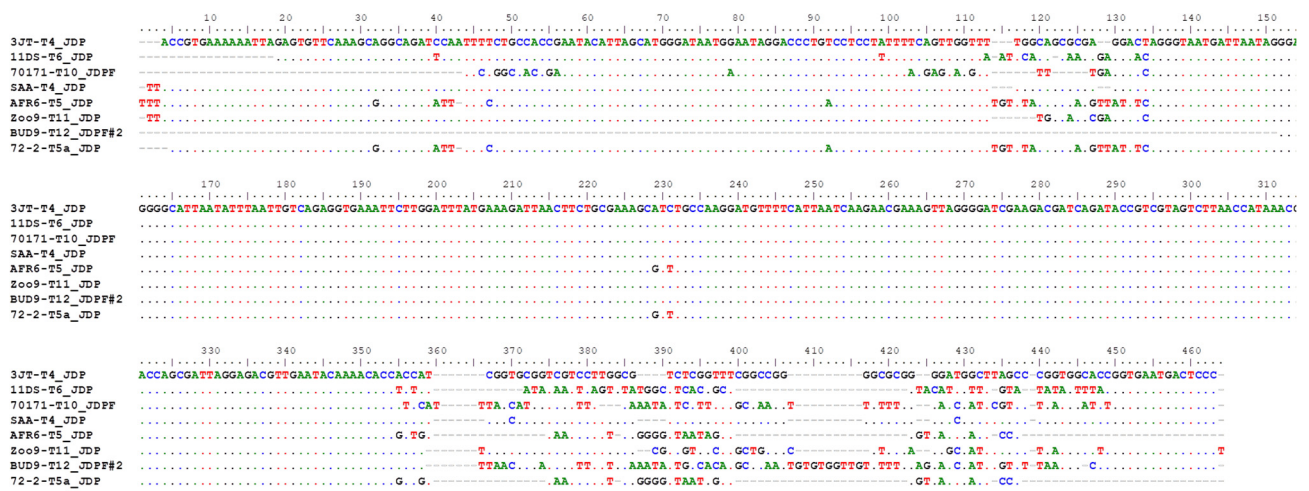

Figure S1. Sequencing Results *Acanthamoeba* strains used for primers validation: 3JT(T4), 11DS (T6), 70171(T10), SAA (T4), AFR6 (T5), Zoo9 (T11), BUD9 (T12), 72-2 (T5)

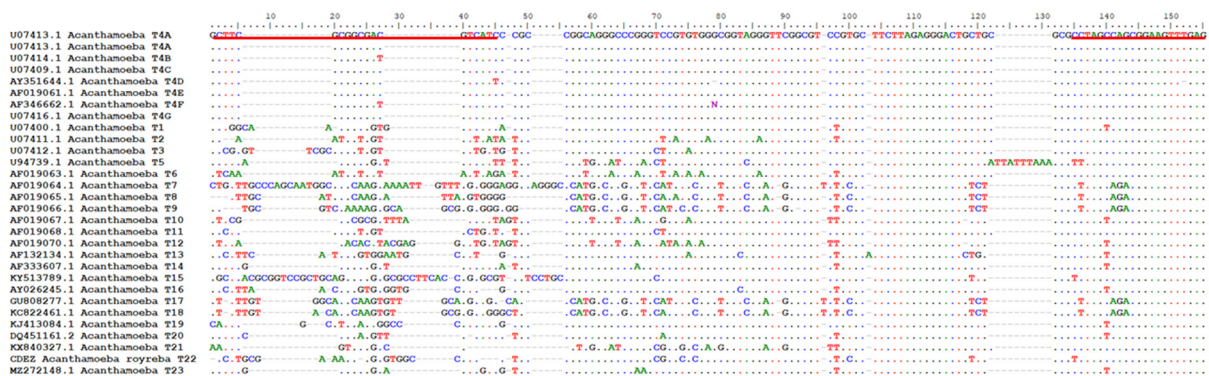

Figure S2. Alignment sequences of the 23 genotypes of *Acanthamoeba* with the position of the T4 primers shown in red.

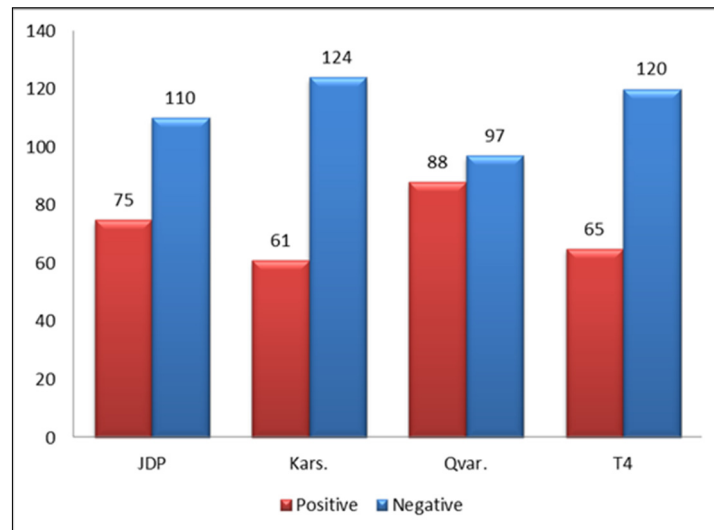

**Figure S3.** PCR results of the 185 clinical corneal samples with JDP, Kars., Qvar., and T4 assays. The numbers of positive samples for each assay are shown in red, and that of negative samples in blue. The “Qvar.” assay was the most sensitive with 47.6% positive samples, followed by JDP assay (40.54%), T4 assay (35.14%), and Kars. assay (32.97%).

#### Sequencing data:

>3JT-T4\_JDP

Accgtgaaaaattagagtgttcaaagcaggcagatccaattttctgccaccgaatacattagcatgggataatggaataggaccctgtcctcct  
atthtcagttggttttggcagcgaggactagggtaatgattaataggatagttggggcattaatatttaattgtcagaggtgaaattcttgga  
tttatgaaagattaacttctgcgaaagcatctgccaaggatgttttcattaatcaagaacgaaagttaggggatcgaagacgatcagataccgtc  
gtagtcttaaccataaacgatgccgaccagcgattaggagacgttgaatacaaaacaccaccatcggtgcggtcgtccttggcgtctcggtttcgg  
ccggggcgcggggatggcttagcccggtggcaccggtgaatgactccc

>11DS-T6\_JDP

gagtgttcaaagcaggcagattcaattttctgccaccgaatacattagcatgggataatggaataggaccctgtcctcctttttcagttggttaatt  
cacacaagagaggaacagggtaatgattaataggatagttggggcattaatatttaattgtcagaggtgaaattcttggtttatgaaagatt  
aacttctgcgaaagcatctgccaaggatgttttcattaatcaagaacgaaagttaggggatcgaagacgatcagataccgtcgtagtcttaacca  
taaacgatgccgaccagcgattaggagacgttgaatacaaaacacctctatatataattcagtgtagtggttcacggctgtacattgtttgtatata  
gtttacggtgaatgactccc

>72-2-T5\_JDPR2

gagtgttcaaagcaggcagattcaattttctgccaccgaatacattagcatgggataatggaataggaccctgtcctcctttttcagttggttaatt  
cacacaagagaggaacagggtaatgattaataggatagttggggcattaatatttaattgtcagaggtgaaattcttggtttatgaaagatt  
aacttctgcgaaagcatctgccaaggatgttttcattaatcaagaacgaaagttaggggatcgaagacgatcagataccgtcgtagtcttaacca

taaacgatgccgaccagcgattaggagacgttgaatacaaaaacacctctatatataattcagtgtatggcttcacggctgtacattgtttgtatata  
gtttacggatgaatgactccc

>70171-T10\_JDPF

ttctggccaccgaaatacattagcatgggataatgaaataggaccctgtcctcctatttacgagtaggttttgaggaccagggtaatgattaata  
gggtagtcgggggcattaatatttaattgtcagaggtgaaattcttggttatgaaagattaacttctgcgaaagcatctgccaaggatgtttc  
attaatcaagaacgaaagttaggggatcgaagacgatcagataccgtcgtagtcttaaccataaacgatgccgaccagcgattaggagacgttg  
aatacaaaaacaccatccatttagcatggtcgttttcaaataattccttttgcgaaggtgtttgggaacgattcgtcctgatggatctggtgaatgac  
tccc

>SAA-T4\_JDP

ttaccgtgaaaaaattagagtgttcaaagcaggcagatccaatcttctgccaccgaatacattagcatgggataatggaataggaccctgtcctcc  
tattttcagttggttttggcagcgcgaggactagggtaatgattaataggatagttgggggcattaatatttaattgtcagaggtgaaattcttg  
atttatgaaagattaacttctgcgaaagcatctgccaaggatgtttcattaatcaagaacgaaagttaggggatcgaagacgatcagataccgt  
cgtagtcttaaccataaacgatgccgaccagcgattaggagacgttgaatacaaaaacaccaccatcggcgcggtcgtccttggcgtctcggtttc  
ggccggggcgcggggacggcttagcccgtggcaccggatgaatgactccc

>AFR6-T5\_JDP

ttaccgtgaaaaaattagagtgttcaaagcgggcagatattttctgccaccgaatacattagcatgggataatggaataggaccctgacctcc  
tattttcagttggttttttacagcaggttatatcagggtaatgattaataggatagttgggggcattaatatttaattgtcagaggtgaaattct  
tggatttatgaaagattaacttctgcgaaagcgtttgccaaggatgtttcattaatcaagaacgaaagttaggggatcgaagacgatcagatac  
cgtcgtagtcttaaccataaacgatgccgaccagcgattaggagacgttgaatacaaaaacaccaccgtgttaatcctttcgggggttaatagttggtg  
aatgactccc

>Zoo9-T11\_JDP

Ttaccgtgaaaaaattagagtgttcaaagcaggcagatccaatcttctgccaccgaatacattagcatgggataatggaataggaccctgtcctc  
ctattttcagttggttttggcacgcgaggaccagggtaatgattaataggatagttgggggcattaatatttaattgtcagaggtgaaattcttg  
atttatgaaagattaacttctgcgaaagcatctgccaaggatgtttcattaatcaagaacgaaagttaggggatcgaagacgatcagataccgt  
cgtagtcttaaccataaacgatgccgaccagcgattaggagacgttgaatacaaaaacaccaccatcggcgcggtcgtccttggcgcgtcgtggct  
tgctgcggcgtgcgagggcgatttagcctgatggcatcggtgaatgactccct

>BUD9-T12\_JDPF#2

Ggatagttgggggcattaatatttaattgtcagaggtgaaattcttggttatgaaagattaacttctgcgaaagcatctgccaaggatgtttc  
ttaatcaagaacgaaagttaggggatcgaagacgatcagataccgtcgtagtcttaaccataaacgatgccgaccagcgattaggagacgttga  
atacaaaaacaccaccattaacgcgatcgtttttgcaaataattgccacatgcgcaagtgtgtggtgtgtttggggaacgattgtcttaatggcc  
cggtgaatgactccc

>Hni\_T11

AATATTGGATCTGCCTGCTTTGAACACTCAGATTTATGAAAGATTAACCTTCTGCGAAAGCATCTGCCAAGGATG  
TTTTCATTAATCAAGAACGAAAGTTAGGGGATCGAAGACGATCAGATACCGTCGTAGTCTTAACCATAAACGA  
TGCCGACCAGCGATTAGGAGACGTTGAATACAAAACACCACCATCGGTGCGGTCGTCCTTGGCGCGTCGCGGC

TTGCCGCGGCGTGCGAGGGCGATTTAGCCTGATGGCATCGGTGAATGACTCCCAGCACTTTGTGAGAAABGG  
CCCAA

>WE\_T4

GCCTGCTTTGATCACTCAGATTTATGAAAGATTAACCTCTGCGAAAGCATCTGCCAAGGATGTTTTCATTAATCA  
AGAACGAAAGTTAGGGGATCGAAGACGATCAGATACCGTCGTAGTCTTAACCATAAACGATGCCGACCAGCG  
ATTAGGAGACGTTGAATACAAAACACCACCATCGGTGCGGTCGTCCTTGCGTCTCGGTTTCGGCCGGGGTGC  
GGGGACGGCTTAGCCCGGTGGCACCGGTGAATGACT

>Contig\F2-E2\_289\_T4

TagcagcttgtagatTTTTGGCCcagatcgtttaccgtgaaaaaattagagtgttcaaagcaggcagatccaatTTTctgccaccgaatacatta  
gcatgggataatggaataggacctgtcctcctatTTTcagttggTTTgCCgcgaggaccagggtaatgattaatagggatagttgggggcattaa  
tatttaattgtcagaggtgaaattcttgatttatgaaagattaacttctgcgaaagcatctgccaaggatgTTTcattaatcaagaacgaaagtt  
aggggatcgaagacgatcagataccgtcgtagtcttaaccataaacgatgccgaccagcgattaggagacgttgaataaaaaacaccaccatg  
cgattgcggtcgtctTTTggtgtcgctcacaaggcggcaccggggcggcttagctcgcatggcaccggtgaatgactccctagcagctg
